# Supplementary material
Source: PubMed Central journal article supplement (PMC6802900)
Supplement: JSLHR-62-723-s001.pdf [file JSLHR-62-723-s001.pdf]

**Supplemental Material S1.** Complete dataset.

| PID  | TPO | QAB | WC   | SC   | WF  | GC  | SMP  | Rep  | Read |
|------|-----|-----|------|------|-----|-----|------|------|------|
| 1240 | *1  | 5.8 | 7.1  | 2.5  | 6.0 | 7.4 | 10.0 | 4.6  | 4.2  |
| 1240 | 2   | 7.8 | 10.0 | 6.2  | 6.0 | 8.9 | 10.0 | 7.9  | 8.8  |
| 1240 | 5   | 7.9 | 8.8  | 10.0 | 6.0 | 6.6 | 10.0 | 7.1  | 5.4  |
| 1240 | 8   | 8.7 | 10.0 | 7.5  | 8.2 | 8.6 | 10.0 | 8.8  | 8.3  |
| 1241 | 3   | 3.8 | 7.1  | 8.1  | 1.0 | 0.1 | 10.0 | 1.7  | 0.0  |
| 1241 | 6   | 2.2 | 4.2  | 1.9  | 0.0 | 0.1 | 10.0 | 3.8  | 0.0  |
| 1241 | 8   | 4.5 | 5.4  | 1.9  | 2.5 | 6.5 | 10.0 | 5.0  | 0.0  |
| 1241 | 10  | 5.2 | 7.9  | 3.1  | 3.8 | 6.1 | 10.0 | 3.8  | 0.0  |
| 1241 | 13  | 4.4 | 5.8  | 1.2  | 2.8 | 6.1 | 10.0 | 5.0  | 0.0  |
| 1263 | 4   | 3.1 | 0.0  | 1.2  | 1.0 | 6.4 | 10.0 | 5.8  | 0.0  |
| 1263 | 6   | 4.2 | 0.0  | 2.9  | 2.0 | 6.8 | 10.0 | 9.2  | 0.0  |
| 1263 | 11  | 4.1 | 2.5  | 0.0  | 3.0 | 6.6 | 10.0 | 7.1  | 0.4  |
| 1266 | 4   | 7.7 | 10.0 | 7.5  | 8.8 | 8.8 | 2.5  | 8.3  | 6.7  |
| 1266 | 8   | 8.0 | 10.0 | 9.2  | 8.6 | 7.5 | 2.5  | 8.3  | 8.3  |
| 1268 | 2   | 1.3 | 5.8  | 1.2  | 0.0 | 0.0 | 0.0  | 0.0  | 0.0  |
| 1268 | 5   | 2.4 | 8.8  | 3.3  | 0.0 | 0.0 | 2.5  | 0.0  | 0.0  |
| 1268 | 7   | 3.0 | 7.5  | 7.5  | 0.0 | 0.0 | 2.5  | 0.8  | 0.0  |
| 1268 | 9   | 3.0 | 8.8  | 4.6  | 0.0 | 0.0 | 5.0  | 2.5  | 0.0  |
| 1268 | 12  | 2.6 | 10.0 | 2.5  | 0.0 | 0.0 | 5.0  | 0.0  | 0.0  |
| 1268 | 15  | 3.0 | 6.2  | 6.2  | 0.2 | 0.0 | 5.0  | 3.8  | 0.0  |
| 1269 | 2   | 8.2 | 10.0 | 8.3  | 6.8 | 8.0 | 10.0 | 7.5  | 9.2  |
| 1269 | 4   | 8.6 | 8.8  | 9.6  | 7.5 | 9.0 | 10.0 | 8.8  | 9.2  |
| 1269 | 6   | 9.2 | 9.6  | 10.0 | 8.1 | 9.9 | 10.0 | 7.9  | 10.0 |
| 1269 | 9   | 9.8 | 10.0 | 10.0 | 9.8 | 9.6 | 10.0 | 9.2  | 9.6  |
| 1269 | 11  | 9.6 | 10.0 | 9.6  | 9.8 | 9.5 | 10.0 | 10.0 | 10.0 |
| 1269 | 13  | 9.0 | 9.6  | 7.9  | 9.0 | 9.8 | 10.0 | 8.3  | 10.0 |
| 1274 | 4   | 7.6 | 10.0 | 6.7  | 5.2 | 7.0 | 10.0 | 9.2  | 7.5  |
| 1274 | 14  | 8.1 | 10.0 | 7.1  | 6.2 | 7.6 | 10.0 | 9.2  | 9.6  |
| 1283 | 5   | 8.2 | 9.6  | 10.0 | 7.0 | 6.4 | 10.0 | 7.1  | 7.9  |
| 1283 | 7   | 8.3 | 10.0 | 10.0 | 8.0 | 6.5 | 10.0 | 6.7  | 6.2  |
| 1283 | 9   | 8.3 | 10.0 | 9.2  | 7.6 | 7.0 | 10.0 | 7.5  | 7.1  |
| 1283 | 14  | 7.5 | 8.3  | 6.7  | 6.5 | 7.1 | 10.0 | 6.2  | 9.6  |
| 1292 | 2   | U   |      |      |     |     |      |      |      |
| 1292 | 4   | 0.4 | 1.2  | 0.8  | 0.0 | 0.0 | 0.0  | 0.0  | 0.0  |
| 1292 | 6   | 0.5 | 2.9  | 0.0  | 0.0 | 0.0 | 0.0  | 0.0  | 0.0  |
| 1292 | 9   | 0.3 | 1.7  | 0.0  | 0.0 | 0.0 | 0.0  | 0.0  | 0.0  |
| 1292 | 11  | 0.6 | 2.9  | 0.0  | 0.0 | 0.0 | 0.0  | 0.4  | 0.0  |

|      |    |     |      |      |     |      |      |      |      |
|------|----|-----|------|------|-----|------|------|------|------|
| 1292 | 13 | 1.6 | 0.4  | 0.4  | 2.6 | 1.0  | 2.5  | 1.2  | 0.4  |
| 1295 | *1 | U   |      |      |     |      |      |      |      |
| 1295 | 3  | 2.3 | 10.0 | 0.0  | 0.2 | 0.0  | 5.0  | 0.4  | 0.0  |
| 1295 | 5  | 2.6 | 10.0 | 1.7  | 0.5 | 0.0  | 5.0  | 0.4  | 0.4  |
| 1295 | 7  | 2.9 | 9.6  | 3.8  | 0.2 | 0.0  | 5.0  | 0.4  | 0.0  |
| 1295 | 9  | 3.0 | 10.0 | 2.9  | 0.5 | 0.1  | 5.0  | 2.1  | 0.8  |
| 1303 | 2  | 6.9 | 7.1  | 6.2  | 5.2 | 7.4  | 10.0 | 9.2  | 3.8  |
| 1303 | 4  | 6.6 | 9.2  | 5.8  | 5.0 | 7.1  | 10.0 | 7.9  | 0.4  |
| 1303 | 7  | 7.6 | 9.2  | 7.5  | 6.5 | 7.5  | 10.0 | 9.2  | 4.2  |
| 1303 | 9  | 7.6 | 10.0 | 7.5  | 7.2 | 7.0  | 10.0 | 8.8  | 2.9  |
| 1303 | 14 | 7.1 | 9.6  | 7.5  | 5.0 | 5.6  | 10.0 | 9.2  | 2.9  |
| 1304 | 2  | 1.7 | 2.5  | 1.2  | 1.8 | 0.0  | 10.0 | 0.0  | 0.0  |
| 1304 | 4  | 3.5 | 2.5  | 3.3  | 1.0 | 1.0  | 10.0 | 8.8  | 7.9  |
| 1304 | 7  | 7.5 | 9.6  | 7.1  | 6.0 | 6.5  | 10.0 | 9.2  | 9.2  |
| 1304 | 9  | 7.7 | 9.2  | 5.4  | 6.5 | 7.8  | 10.0 | 10.0 | 9.2  |
| 1304 | 11 | 8.5 | 10.0 | 7.5  | 7.0 | 8.6  | 10.0 | 9.6  | 9.2  |
| 1306 | 3  | 6.5 | 7.9  | 3.3  | 3.0 | 8.5  | 10.0 | 8.3  | 10.0 |
| 1306 | 5  | 8.2 | 8.8  | 6.7  | 6.8 | 10.0 | 10.0 | 8.3  | 10.0 |
| 1308 | 3  | U   |      |      |     |      |      |      |      |
| 1308 | 5  | 5.7 | 9.6  | 8.3  | 3.2 | 0.9  | 10.0 | 7.5  | 6.7  |
| 1308 | 11 | 6.7 | 7.1  | 4.6  | 5.8 | 6.8  | 10.0 | 6.7  | 9.2  |
| 1311 | 2  | 4.9 | 7.5  | 0.0  | 2.9 | 5.8  | 10.0 | 2.1  | 9.2  |
| 1311 | 4  | 6.2 | 10.0 | 0.0  | 5.9 | 6.2  | 10.0 | 5.8  | 10.0 |
| 1311 | 7  | 6.3 | 8.8  | 0.0  | 5.9 | 7.5  | 10.0 | 6.7  | 9.2  |
| 1311 | 11 | 6.0 | 8.8  | 0.0  | 6.1 | 4.4  | 10.0 | 7.9  | 8.3  |
| 1311 | 14 | 8.1 | 10.0 | 7.5  | 6.7 | 7.0  | 10.0 | 9.2  | 8.3  |
| 1314 | 3  | 7.4 | 10.0 | 5.0  | 5.2 | 9.0  | 7.5  | 8.3  | 8.3  |
| 1314 | 5  | 7.6 | 7.5  | 10.0 | 6.8 | 6.8  | 7.5  | 6.7  | 8.3  |
| 1314 | 7  | 7.5 | 8.8  | 6.2  | 6.0 | 9.0  | 7.5  | 8.3  | 9.2  |
| 1314 | 10 | 6.9 | 5.4  | 8.3  | 4.8 | 7.4  | 7.5  | 8.8  | 8.3  |
| 1314 | 12 | 7.1 | 8.8  | 6.7  | 6.2 | 6.8  | 7.5  | 8.3  | 6.7  |
| 1315 | 6  | 6.9 | 9.6  | 5.8  | 4.5 | 7.0  | 10.0 | 9.2  | 3.8  |
| 1315 | 8  | 6.9 | 9.6  | 3.8  | 5.8 | 7.8  | 10.0 | 6.7  | 7.1  |
| 1315 | 12 | 7.5 | 9.6  | 3.3  | 6.5 | 9.2  | 10.0 | 9.6  | 8.3  |
| 1315 | 14 | 8.1 | 10.0 | 8.3  | 6.0 | 8.8  | 10.0 | 7.9  | 7.5  |
| 1320 | *1 | U   |      |      |     |      |      |      |      |
| 1320 | 4  | U   |      |      |     |      |      |      |      |
| 1320 | 6  | U   |      |      |     |      |      |      |      |
| 1320 | 8  | U   |      |      |     |      |      |      |      |
| 1320 | 10 | 1.5 | 1.2  | 0.0  | 0.0 | 0.2  | 10.0 | 4.2  | 1.7  |
| 1320 | 13 | 4.3 | 4.6  | 0.0  | 3.0 | 5.4  | 10.0 | 7.5  | 6.2  |

|      |    |     |      |     |     |     |      |     |     |
|------|----|-----|------|-----|-----|-----|------|-----|-----|
| 1321 | 3  | 7.8 | 10.0 | 5.8 | 7.5 | 7.8 | 10.0 | 8.8 | 7.1 |
| 1321 | 5  | 7.3 | 7.9  | 5.4 | 4.8 | 8.9 | 10.0 | 8.8 | 9.2 |
| 1321 | 7  | 7.0 | 9.6  | 0.8 | 6.5 | 7.9 | 10.0 | 8.8 | 8.8 |
| 1321 | 10 | 7.9 | 9.6  | 5.0 | 8.6 | 8.0 | 10.0 | 8.8 | 9.6 |
| 1321 | 12 | 7.9 | 9.6  | 5.8 | 4.8 | 9.0 | 10.0 | 9.2 | 9.2 |
| 1347 | 2  | U   |      |     |     |     |      |     |     |
| 1347 | 5  | U   |      |     |     |     |      |     |     |
| 1347 | 7  | 1.4 | 0.0  | 0.0 | 0.0 | 0.5 | 10.0 | 2.1 | 4.6 |
| 1347 | 12 | 3.3 | 0.0  | 2.5 | 0.0 | 7.6 | 10.0 | 0.8 | 8.8 |
| 1347 | 15 | 3.0 | 0.0  | 0.0 | 0.0 | 7.5 | 10.0 | 4.6 | 7.1 |
| 1348 | 2  | U   |      |     |     |     |      |     |     |
| 1348 | 5  | U   |      |     |     |     |      |     |     |
| 1348 | 7  | 3.0 | 3.8  | 0.0 | 2.5 | 0.8 | 10.0 | 4.2 | 9.2 |
| 1348 | 9  | 3.5 | 5.8  | 0.0 | 2.0 | 0.9 | 10.0 | 5.8 | 9.6 |
| 1348 | 12 | 3.4 | 7.5  | 0.0 | 2.2 | 0.8 | 10.0 | 2.1 | 7.9 |
| 1348 | 15 | 5.5 | 7.9  | 0.0 | 4.9 | 6.9 | 10.0 | 4.6 | 9.2 |

*Note.* PID = patient identification number; TPO = time postonset (days); QAB = Quick Aphasia Battery overall (Wilson, Eriksson, Schneck, & Lucanie, 2018); WC = Word comprehension; SC = Sentence comprehension; WF = Word finding; GC = Grammatical construction; SMP = Speech motor programming; Rep = Repetition; Read = Reading; U = Untestable.

\*Time point not included in statistical analysis.

## Reference

Wilson, S. M., Eriksson, D. K., Schneck, S. M., & Lucanie, J. M. (2018). A Quick Aphasia Battery for efficient, reliable, and multidimensional assessment of language function. *PLoS One*, *13*, e0192773.
